# Supplementary material for: Core–shell Cu@Cu2O nanoparticles embedded in 3D honeycomb-like N-doped graphitic carbon for photocatalytic CO2 reduction
Source: Royal Society of Chemistry journal article supplement (doi:10.1039/d1ta10514k), 2022-01-01
Supplement: d1ta10514k1.pdf [file d1ta10514k1.pdf]

## Supplementary material

### Core-Shell Cu@Cu<sub>2</sub>O Nanoparticles Embedded in 3D Honeycomb-like N-Doped Graphitic

#### Carbon for Photocatalytic CO<sub>2</sub> Reduction

Lang He<sup>a</sup>, Wenyuan Zhang<sup>b</sup>, Kristin Zhao<sup>c</sup>, Sheng Liu,<sup>a\*</sup> Yan Zhao<sup>a\*</sup>

<sup>a</sup> The Institute of Technological Sciences, Wuhan University, Wuhan, 430072, P. R. China.

<sup>b</sup> School of Chemistry and Chemical Engineering, Harbin Institute of Technology, Harbin, 150080, P. R. China

<sup>c</sup> Lynbrook High School, San Jose, CA 95129

\* Corresponding author

E-mail: [victor\\_liu63@vip.126.com](mailto:victor_liu63@vip.126.com) (S. Liu); [yan2000@whut.edu.cn](mailto:yan2000@whut.edu.cn) (Y. Zhao)

#### Table of Contents

|                                                                                                                                                                                                                                                                                                                                          |
|------------------------------------------------------------------------------------------------------------------------------------------------------------------------------------------------------------------------------------------------------------------------------------------------------------------------------------------|
| <p><b>Figure S1.</b> Thermogravimetric (TG) curve of sample precursor PVP-Cu<sup>2+</sup> (N<sub>2</sub> atmosphere).</p> <p><b>Figure S2.</b> (a) XRD of PVP-Cu<sup>2+</sup> precursor, Cu@Cu<sub>2</sub>O/N-GC-200, Cu@Cu<sub>2</sub>O/N-GC-300 and Cu@Cu<sub>2</sub>O/N-GC-400.</p>                                                   |
| <p><b>Figure S3.</b> SEM images of (a) PVP-Cu<sup>2+</sup> precursor (b) Cu@Cu<sub>2</sub>O/N-GC-200, (c) Cu@Cu<sub>2</sub>O/N-GC-200 and (d) Cu@Cu<sub>2</sub>O/N-GC-400 sample.</p> <p><b>Figure S4.</b> EDS spectra of (a) Cu@Cu<sub>2</sub>O/N-GC-500 and (b) Cu@Cu<sub>2</sub>O/N-GC-700.</p>                                       |
| <p><b>Figure S5</b> N<sub>2</sub> adsorption–desorption isotherms plot of Cu@Cu<sub>2</sub>O/N-GC composites.</p> <p><b>Figure S6</b> Low-TEM image of Cu@Cu<sub>2</sub>O/N-GC-600</p>                                                                                                                                                   |
| <p><b>Figure S7</b> XPS survey spectra of the Cu@Cu<sub>2</sub>O/N-GC-600</p> <p><b>Figure S8.</b> The XPS survey spectra Cu 2p of (a) Cu@Cu<sub>2</sub>O/N-GC-500 (b) Cu@Cu<sub>2</sub>O/N-GC-700 sample.</p>                                                                                                                           |
| <p><b>Figure S9</b> UV vis/DRS spectra (a) and band gap energy estimations from the plots of (αhν)<sup>2</sup> versus hν (b) for Cu@Cu<sub>2</sub>O/N-GC-500, Cu@Cu<sub>2</sub>O/N-GC-600 and Cu@Cu<sub>2</sub>O/N-GC-700 samples.</p> <p><b>Figure S10.</b> The optimized geometric structures of (a) N-doped single-layer graphite</p> |

|                                                                                                                                                                                                                       |
|-----------------------------------------------------------------------------------------------------------------------------------------------------------------------------------------------------------------------|
| carbon (N-GC) and (b) Cu <sub>2</sub> O (111) surfaces.                                                                                                                                                               |
| <b>Figure S11.</b> Electrostatic potentials of Cu (111) surface.                                                                                                                                                      |
| <b>Figure S12.</b> Comparison of gas chromatograms of the photocatalytic CO <sub>2</sub> RR of gaseous products on the Cu@Cu <sub>2</sub> O/N-GC-600 catalyst under different conditions under 1 h light irradiation. |
| <b>Figure S13.</b> The CO <sub>2</sub> reduction spectrum of all composites accumulated for 1 h under visible light irradiation.                                                                                      |
| <b>Figure S14.</b> (a) Photocatalytic activities of the CO <sub>2</sub> reduction over Cu/N-GC photocatalysts.                                                                                                        |
| <b>Figure S15.</b> (a) Selectivity and AQY of CO and CH <sub>4</sub> for Cu@Cu <sub>2</sub> O/N-GC-500, Cu@Cu <sub>2</sub> O/N-GC-600 and Cu@Cu <sub>2</sub> O/N-GC-700.                                              |
| <b>Figure S16.</b> Schematic illustration of (a) a type-II heterojunction; (b) direct Z-scheme heterojunction; and (c) S-scheme heterojunction. S1, semiconductor 1; S2, semiconductor 2;                             |
| <b>Table S1</b> Temperature changes during the photocatalytic CO <sub>2</sub> RR under visible light irradiation                                                                                                      |
| <b>Table S2</b> BET results of the Cu@Cu <sub>2</sub> O/N-GC catalysts.                                                                                                                                               |
| <b>Table S3</b> Fitting parameters for TRPL curves recorded for Cu@Cu <sub>2</sub> O/N-GC-500, Cu@Cu <sub>2</sub> O/N-GC-600 and Cu@Cu <sub>2</sub> O/N-GC-700 samples.                                               |
| <b>Table S4</b> Cu 2p peak position and peak area ratio (Cu <sub>2</sub> O/Cu) of samples                                                                                                                             |
| <b>Table S5.</b> Comparison of the gas photocatalytic performance for the Cu <sub>2</sub> O-based photocatalysts reported in the literature.                                                                          |
| <b>References</b>                                                                                                                                                                                                     |

## Time-resolved transient PL measurement

Fluorescence lifetime and steady-state spectrometer (FLs980, Edinburgh Instruments, UK) was used to test the steady-state lifetime photoluminescence (PL) spectrum and time-resolved photoluminescence (TRPL) spectrum, and the excitation wavelength was 384 nm. The emission decay data were fitted to a double-exponential model and the emission decay behavior is deduced through Eq. (1)

$$\tau_{\text{avg.}} = \frac{A_1\tau_1^2 + A_2\tau_2^2}{A_1\tau_1 + A_2\tau_2} \quad (1)$$

where  $\tau$  and  $A$  are the decay time and the relative magnitude of components, respectively, and  $\tau_{\text{avg.}}$  is the intensity-averaged lifetime used for an overall comparison. The fitting results show the fast decay component ( $\tau_1$  and  $A_1$ ) and the minority-slow component ( $\tau_2$  and  $A_2$ ), decaying from the free excited states and the bound excited states, respectively.

## CO<sub>2</sub> Product Selectivity Calculation:

According to the electron transfer number for producing each reduction product (8e<sup>-</sup> for CH<sub>4</sub> and 2e<sup>-</sup> for CO), the selectivity of CH<sub>4</sub> is defined as follows:<sup>1</sup>

$$\text{CO (selectivity \%)} = \frac{\text{Yield}_{(\text{CO})} \times 2}{\text{Yield}_{(\text{CO})} \times 2 + \text{Yield}_{(\text{CH}_4)} \times 8} \times 100\%$$

$$\text{CH}_4 \text{ (selectivity \%)} = \frac{\text{Yield}_{(\text{CH}_4)} \times 8}{\text{Yield}_{(\text{CO})} \times 2 + \text{Yield}_{(\text{CH}_4)} \times 8} \times 100\%$$

## Apparent Quantum Yield values measurement.

Apparent quantum Yield (AQY) values were calculated using the following equation:<sup>2,3</sup>

$$\text{AQY} = \frac{\text{number of reacted electrons}}{\text{number of incident photons}} \times 100\%$$

The external quantum efficiency values for CO and CH<sub>4</sub> generation were determined at 420 nm using a band pass filter with the same photochemical experimental setup. The flux of incident

photons from the power was measured by a power meter (PL-MW2000, Photoradiometer). The lamp intensity at 420 nm was measured to be  $3.97 \text{ W}\cdot\text{cm}^2$ , the illuminated area was  $28.71 \text{ cm}^2$ , and the incident photons flux was calculated to be  $4777.92 \text{ h}^{-1}$ .

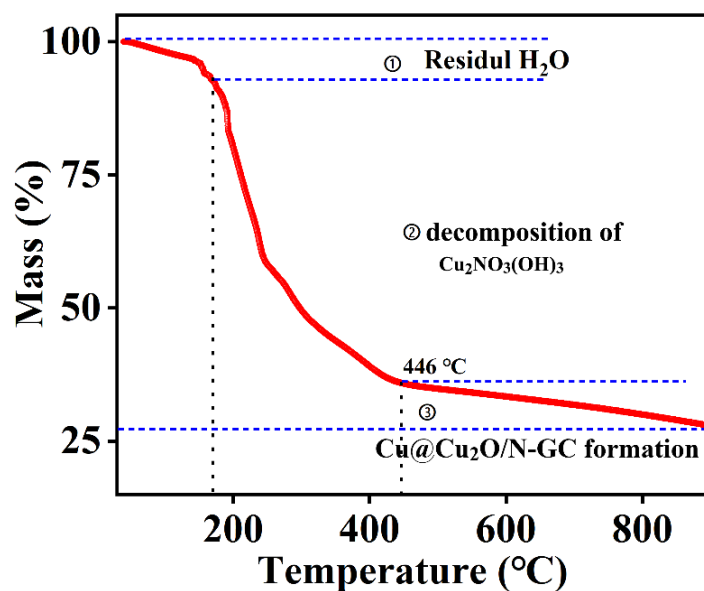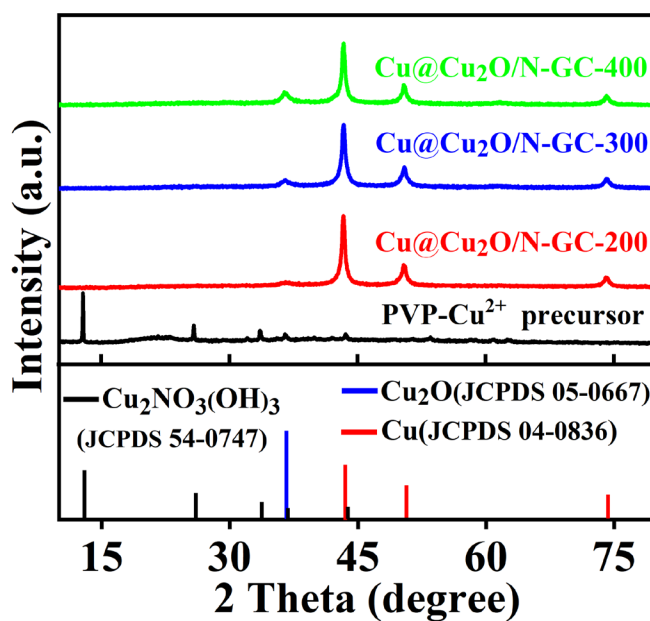

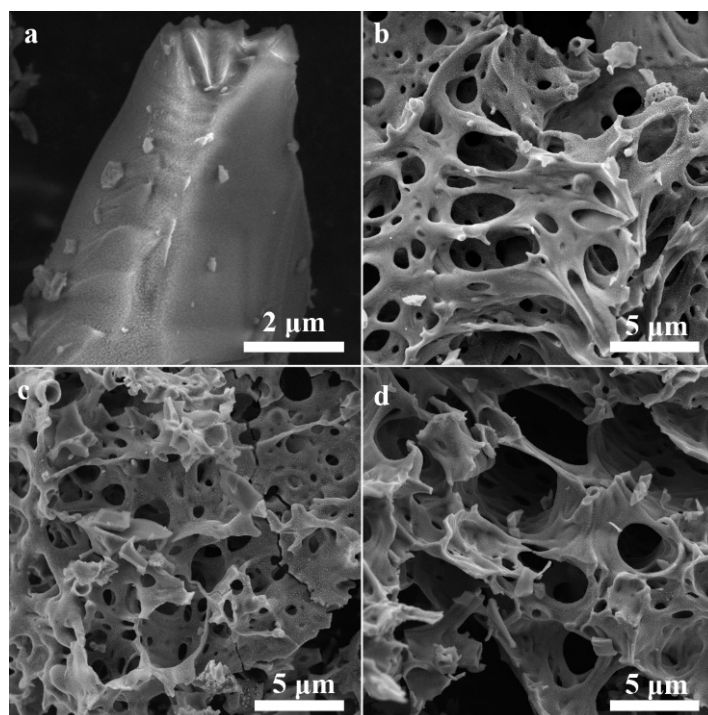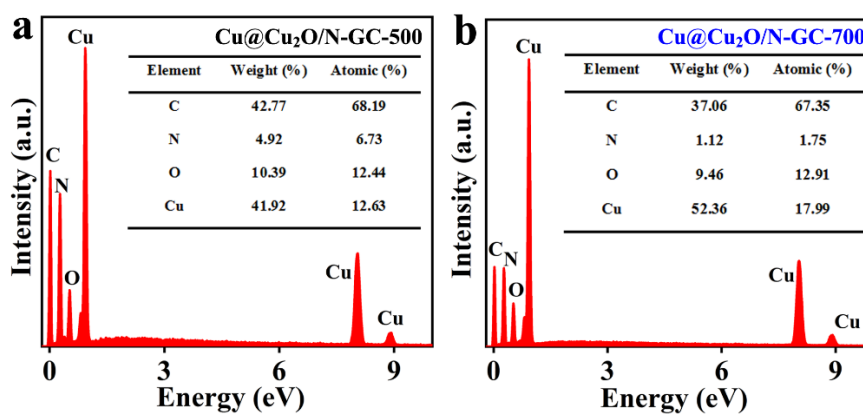

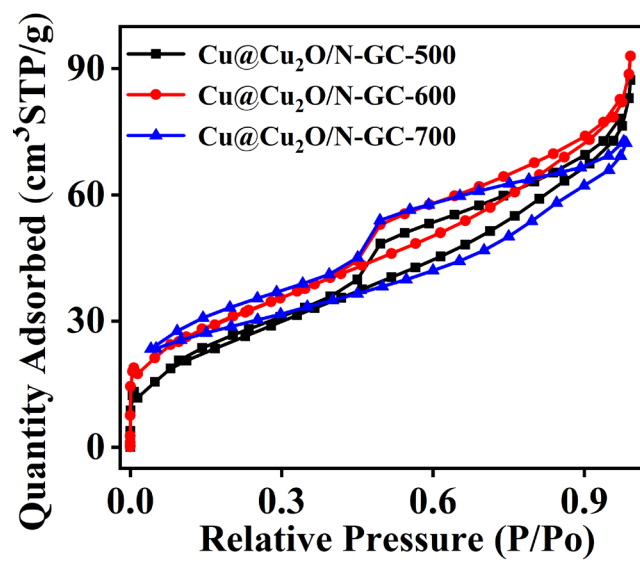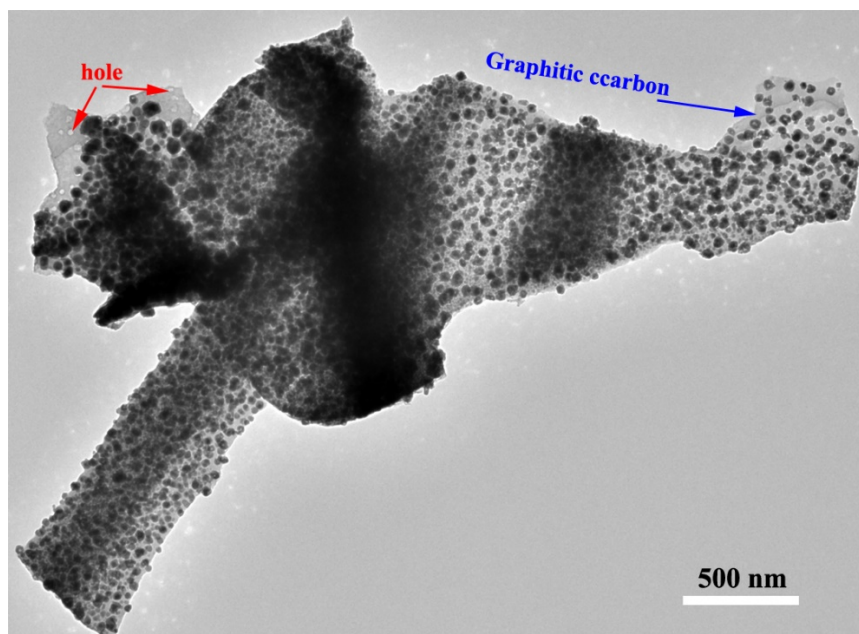

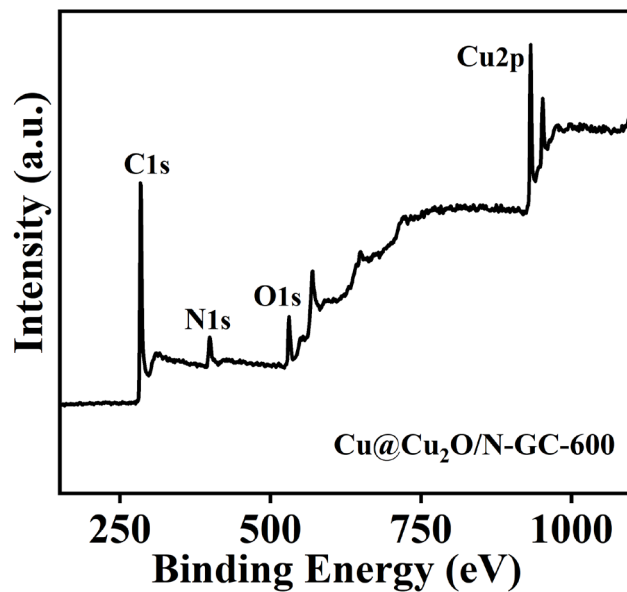

Figure S7 XPS survey spectra of the Cu@Cu<sub>2</sub>O/N-GC-600

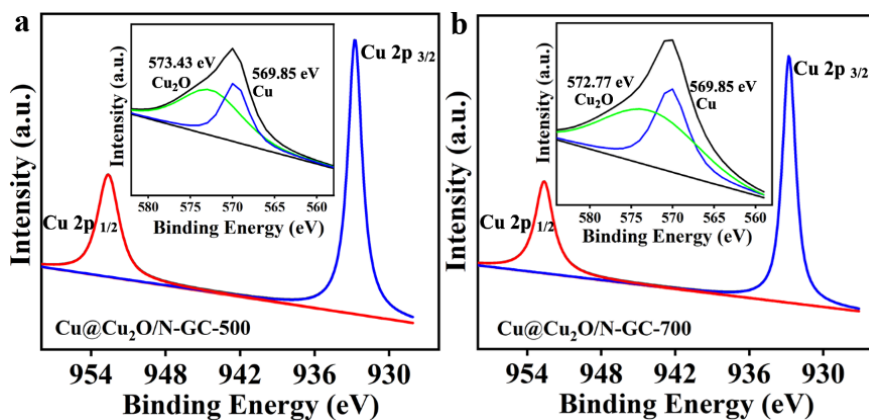

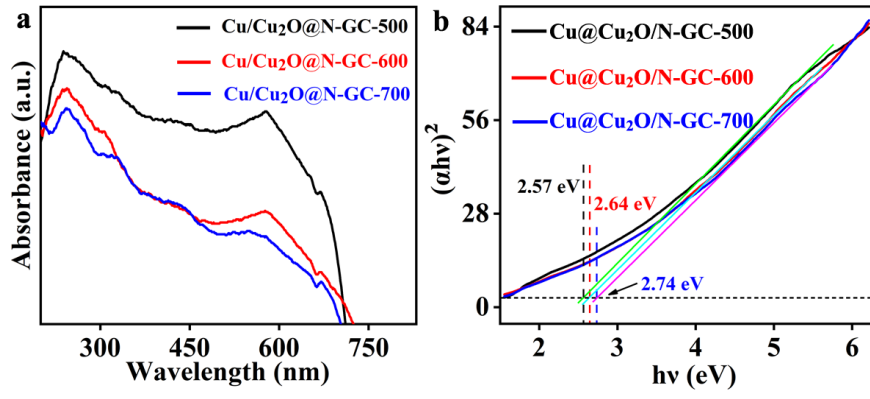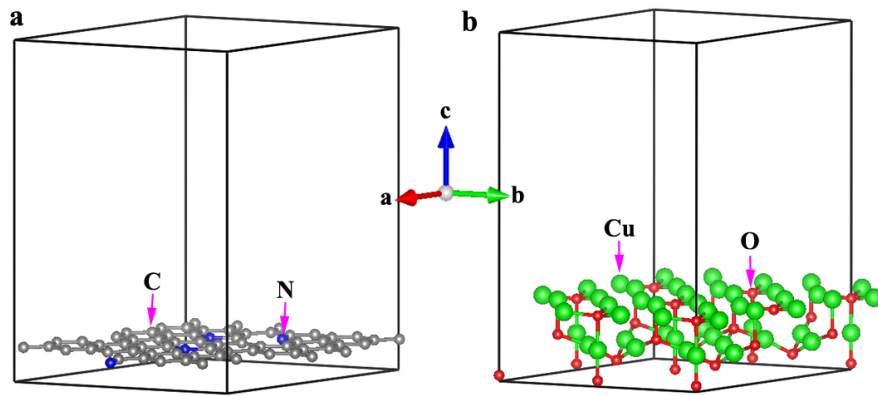



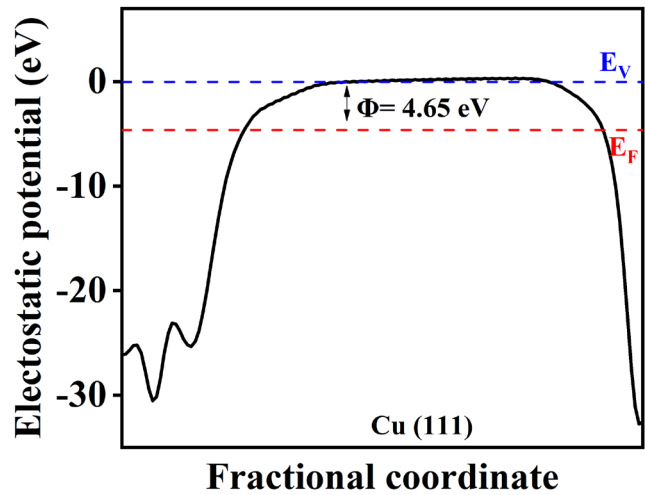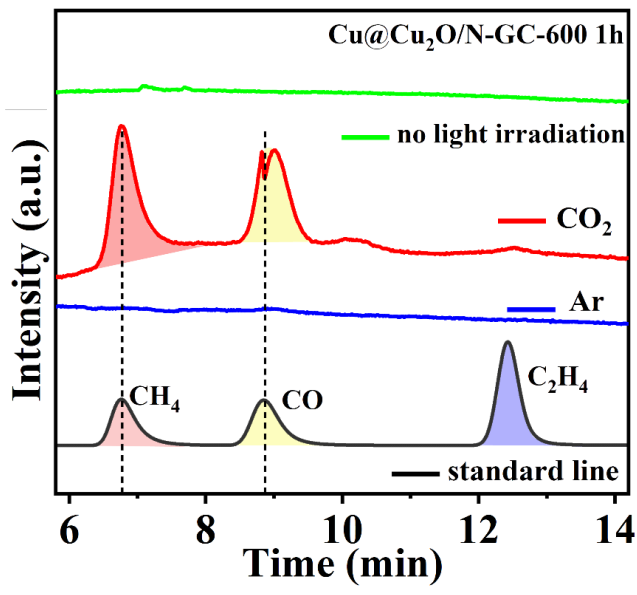

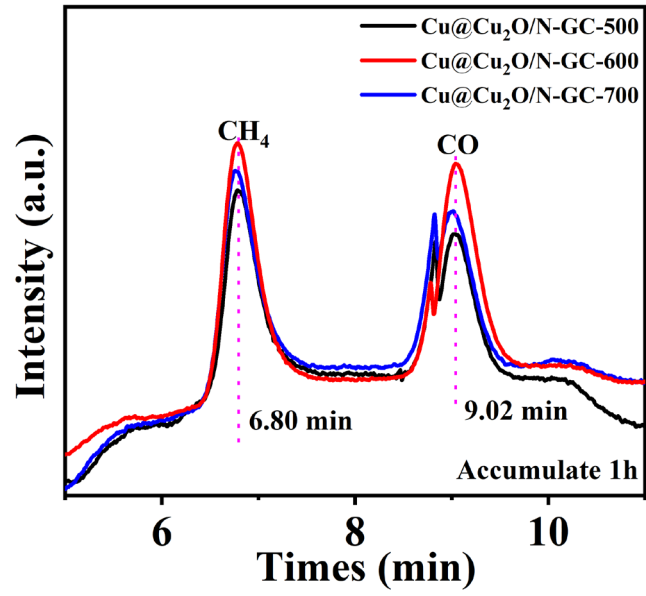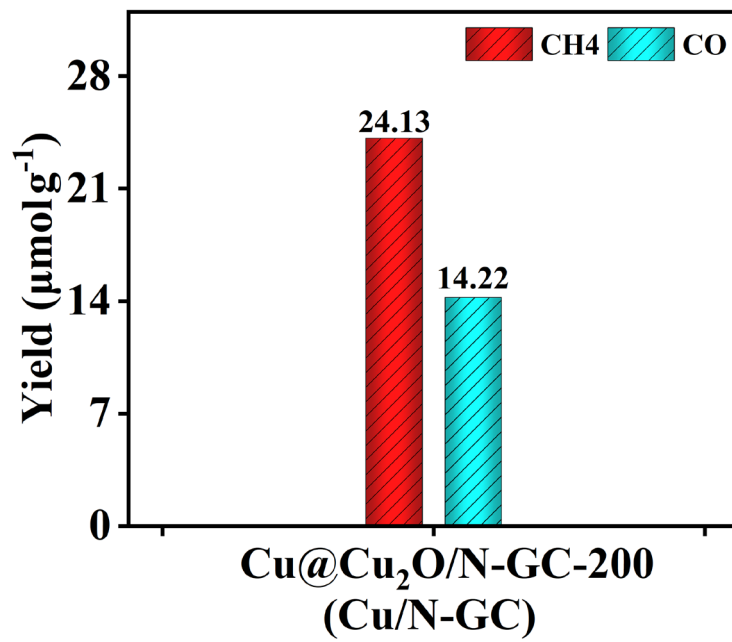

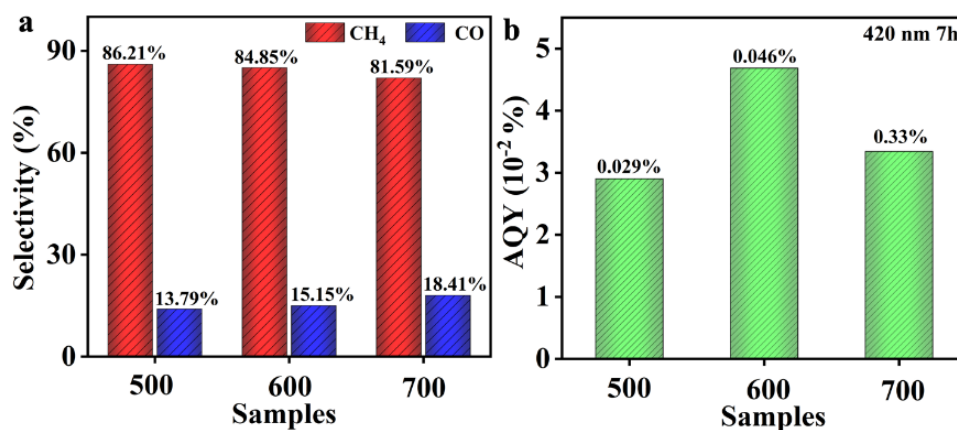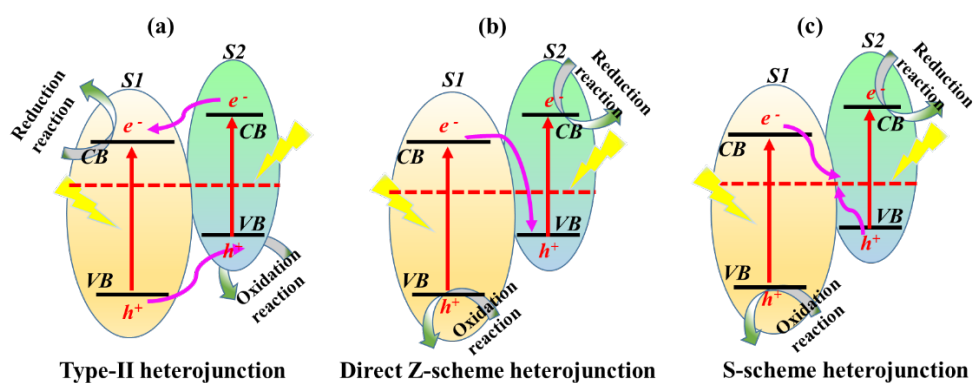

As shown in **Figure S16a**, two semiconductors S1 and S2 with a staggered band structure configuration can form the type II heterojunction, both the CB and VB edges of S2 are higher than those of S1. When the photocatalytic system is excited by light, the photogenerated electrons in the CB of S2 can transfer to the CB of S1 and the photogenerated holes in the VB of S1 can

transfer to the VB of S2 due to the potential difference of CB and VB between the two semiconductors.<sup>4</sup>

In a direct Z-scheme heterojunction (**Figure S16b**), S1 and S2 are excited by light irradiation, and the photogenerated electrons in the CB of S1 can directly recombine with the holes in the VB of S2. Thus, the photogenerated electrons in the CB of S2 and photogenerated holes in the VB of S1 are spatially separated and also maintain their initial strong redox capability, which enhances the efficiency of the redox reactions.<sup>3</sup>

In an S-scheme heterojunction (**Figure S16c**), when S1 and S2 come into contact, their Fermi energy should be aligned to the same level. This leads to an upward and downward shift in the Fermi levels of S1 and S2, respectively. The band bending and Coulombic attraction facilitate the recombination of the photogenerated electrons in the CB of S1 and holes in the VB of S2 at the interface region. The active photogenerated electrons and holes are reserved in the CB of S2 and VB of S1, respectively, while the useless photogenerated charge carriers (electrons in CB of S1 and holes in VB of S2) are recombined, resulting a strong redox potential.<sup>5</sup>

As shown in **Figure 9b**, two semiconductors Cu<sub>2</sub>O and N-GC with a staggered band structure configuration can form the S-scheme heterojunction, both the CB and VB edges of N-GC are higher than those of Cu<sub>2</sub>O and Cu. When the Cu@Cu<sub>2</sub>O/N-GC system is excited by light, the photogenerated electrons in the CB of Cu<sub>2</sub>O can transfer to the VB of N-GC. As a result, the photogenerated electrons and holes are spatially separated in Cu<sub>2</sub>O and N-GC, respectively. The photogenerated electrons in N-GC is used to reduce CO<sub>2</sub>. Since the positions of CB of Cu<sub>2</sub>O are close to the VB of N-GC, the excited electrons on CB of Cu<sub>2</sub>O can further capture the photogenerated holes in the VB of N-GC. The photogenerated electrons and holes in Cu<sub>2</sub>O and

N-GC can be spatially separated, which is possibly attributed to the formation of a S-scheme semiconductor heterojunction.<sup>5</sup>

**Table S1** Temperature changes during the photocatalytic CO<sub>2</sub> RR under visible light irradiation

| Test times (h)   | 0    | 1    | 2    | 3    | 4    | 5    | 6    | 7    |
|------------------|------|------|------|------|------|------|------|------|
| Temperature (°C) | 24.0 | 24.3 | 24.6 | 24.9 | 25.0 | 25.1 | 25.3 | 25.3 |

**Table S2** BET results of the Cu@Cu<sub>2</sub>O/N-GC catalysts.

| Samples                       | S <sub>BET</sub> (m <sup>2</sup> /g) | pore sizes (nm) | pore volumes(cm <sup>3</sup> /g) |
|-------------------------------|--------------------------------------|-----------------|----------------------------------|
| Cu@Cu <sub>2</sub> O/N-GC-500 | 37.72                                | 3.43            | 0.025                            |
| Cu@Cu <sub>2</sub> O/N-GC-600 | 89.86                                | 3.80            | 0.079                            |
| Cu@Cu <sub>2</sub> O/N-GC-700 | 49.01                                | 3.43            | 0.028                            |

**Table S3** Fitting parameters for TRPL curves recorded for Cu@Cu<sub>2</sub>O/N-GC-500, Cu@Cu<sub>2</sub>O/N-GC-600 and Cu@Cu<sub>2</sub>O/N-GC-700 samples.

| Sample                             | τ <sub>1</sub> (ns) | % percentage | τ <sub>2</sub> (ns) | % percentage | τ <sub>avrg.</sub> (ns) |
|------------------------------------|---------------------|--------------|---------------------|--------------|-------------------------|
| <b>Cu@Cu<sub>2</sub>O/N-GC-500</b> | 0.37                | 0.64         | 0.36                | 0.36         | 0.36                    |
| <b>Cu@Cu<sub>2</sub>O/N-GC-600</b> | 0.42                | 0.62         | 0.42                | 0.38         | 0.41                    |
| <b>Cu@Cu<sub>2</sub>O/N-GC-700</b> | 0.44                | 0.62         | 0.44                | 0.38         | 0.44                    |

**Table S4** Cu 2p peak position and peak area ratio (Cu<sub>2</sub>O/Cu) of samples

| Sample               | Cu@Cu <sub>2</sub> O/N-GC-500 |        | Cu@Cu <sub>2</sub> O/N-GC-600 |        | Cu@Cu <sub>2</sub> O/N-GC-700 |        |
|----------------------|-------------------------------|--------|-------------------------------|--------|-------------------------------|--------|
| Peak                 | Cu <sub>2</sub> O             | Cu     | Cu <sub>2</sub> O             | Cu     | Cu <sub>2</sub> O             | Cu     |
| Peak position (eV)   | 573.43                        | 569.85 | 573.60                        | 569.20 | 572.77                        | 570.21 |
| Peak area ratio      | <b>1.18</b>                   |        | <b>1.25</b>                   |        | <b>1.51</b>                   |        |
| Cu <sub>2</sub> O/Cu | <b>1.18</b>                   |        | <b>1.25</b>                   |        | <b>1.51</b>                   |        |

**Table S5.** Comparison of the gas photocatalytic performance for the Cu<sub>2</sub>O-based photocatalysts reported in the literature.

| metal oxide Photocatalysts                                   | Product and Yield                                                              | Stability (h) | Ref.      |
|--------------------------------------------------------------|--------------------------------------------------------------------------------|---------------|-----------|
| <b>Cu<sub>2</sub>O/Ti<sub>3</sub>C<sub>2</sub> MXene</b>     | CO (17.55 μmol g <sup>-1</sup> h <sup>-1</sup> )                               | <b>17</b>     | <b>6</b>  |
|                                                              | CH <sub>4</sub> (0.96 μmol g <sup>-1</sup> h <sup>-1</sup> )                   |               |           |
| <b>Cu<sub>2</sub>O@Cu</b>                                    | CH <sub>4</sub> (0.137 μmol cm <sup>-2</sup> )                                 | <b>24</b>     | <b>7</b>  |
| <b>Cu<sub>2</sub>O/CeO<sub>2</sub></b>                       | CO (~1,2 μmol g <sup>-1</sup> h <sup>-1</sup> )                                | <b>30</b>     | <b>8</b>  |
| <b>g-C<sub>3</sub>N<sub>4</sub> foam/Cu<sub>2</sub>O QDs</b> | CO 8.12 μmol g <sup>-1</sup> h <sup>-1</sup>                                   | <b>25</b>     | <b>9</b>  |
|                                                              | CH <sub>4</sub> (~0.1 μmol cm <sup>-2</sup> )                                  |               |           |
| <b>Cu<sub>2</sub>O decorated WO<sub>3</sub></b>              | CH <sub>4</sub> (~10 μmol h <sup>-1</sup> g <sup>-1</sup> )                    | <b>24</b>     | <b>10</b> |
| <b>Cu@Cu<sub>2</sub>O/N-GC</b>                               | CO (27.78 μmol g <sup>-1</sup> ) CH <sub>4</sub> (38.89 μmol g <sup>-1</sup> ) | <b>42</b>     | —         |
| <b>This work</b>                                             | μmol g <sup>-1</sup> )                                                         |               |           |

## References

1. J. Fu, K. Jiang, X. Qiu, J. Yu and M. Liu, *Materials Today*, 2020, **32**, 222-243.
2. Chang, Huang, Xingjiu, Meng, Meng, Qiangqiang, Qunxiang, Wang, Dawei and Zhao, *Advanced Materials*, 2016, **28**, 6485-6490.

3. Y. Lin, Q. Zhang, Y. Li, Y. Liu, K. Xu, J. Huang, X. Zhou and F. Peng, *ACS Sustainable Chemistry & Engineering*, 2020, **8**, 4537-4546.
4. T. Kothe, N. Plumeré, A. Badura, M. M. Nowaczyk, D. A. Guschin, M. R?Gner and W. Schuhmann, *Angewandte Chemie*, 2013, **52**, 14233-14236.
5. Q. Xu, L. Zhang, B. Cheng, J. Fan and J. Yu, *Chem*, 2020, **6**, 1543-1559.
6. J. Zhang, J. Shi, S. Tao, L. Wu and J. Lu, *Appl. Surf. Sci.*, 2020, **542**, 148685.
7. J. Zhou, Y. Li, L. Yu, Z. Li, D. Xie, Y. Zhao and Y. Yu, *Chem. Eng. J.*, 2020, **385**, 123940.
8. Y. Pu, Y. Luo, X. Wei, J. Sun, L. Li, W. Zou and L. Dong, *Appl. Catal. B Environ.*, 2019, **254**, 580-586.
9. Z. Sun, W. Fang, L. Zhao, H. Chen, X. He, W. Li, P. Tian and Z. Huang, *Environment International*, 2019, **130**, 104898.
10. W. Shi, X. Guo, C. Cui, K. Jiang, Z. Li, L. Qu and J.-C. Wang, *Appl. Catal. B Environ.*, 2019, **243**, 236-242.
